# Supplementary material
Source: PubMed Central journal article supplement (PMC8752158)
Supplement: aem.01819-21-s0001.pdf [file aem.01819-21-s0001.pdf]

## Supplementary information

### Discovery of a novel glucuronan lyase system in *Trichoderma parareesei*

Bo Pilgaard, Marlene Vuillemin, Line Munk, Jesper Holck, Sebastian Meier, Casper Wilkens\* & Anne S. Meyer\*

Protein Chemistry and Enzyme Technology Section, DTU Bioengineering, Department of Biotechnology and Biomedicine, Technical University of Denmark, 2800 Kgs. Lyngby, Denmark.

DTU Chemistry, Department of Chemistry, Technical University of Denmark, 2800 Kgs. Lyngby, Denmark.

\*Corresponding author. Address as above, e-mail: cwil@dtu.dk; asme@dtu.dk

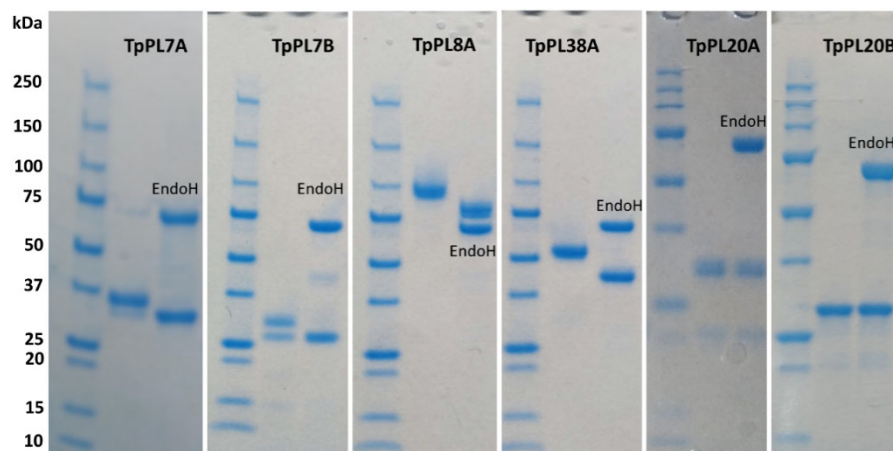

**Supplementary Figure 1.** 4-12% gradient SDS-page gels of the purified recombinant lyases before and after endoH treatment. EndoH is marked by text closest to the band representing it.

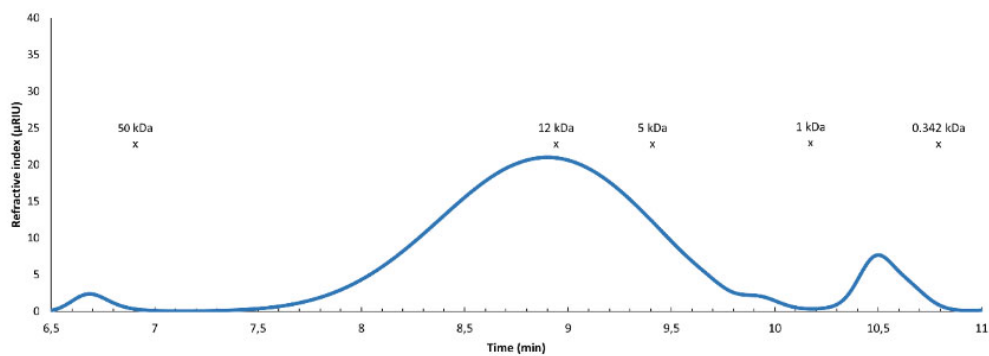

**Supplementary Figure 2.** HP-SEC of the TEMPO prepared polyglucuronic acid at a concentration of 10 g/L. The peaks of the pullulan size standards are marked by x and the size in kDa.

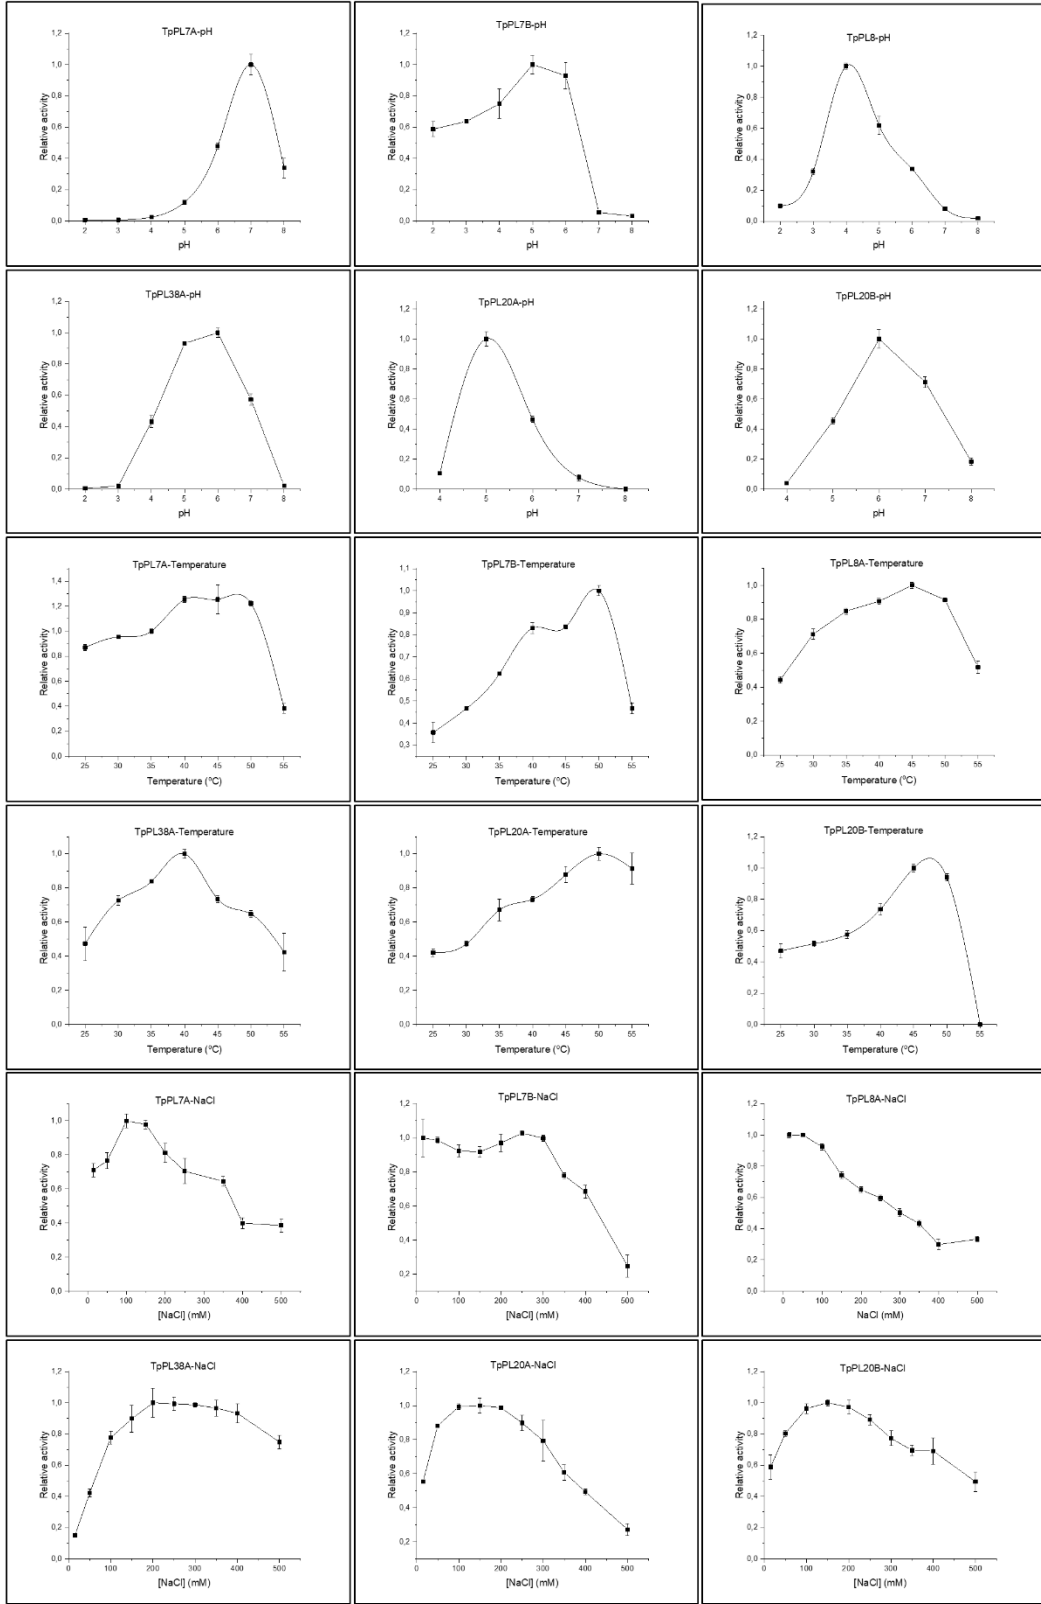

**Supplementary Figure 3.** Biochemical characterisations of the six recombinant glucuronan lyases from *T. pararesei*. Error bars represent standard deviations of triplicate experiments.

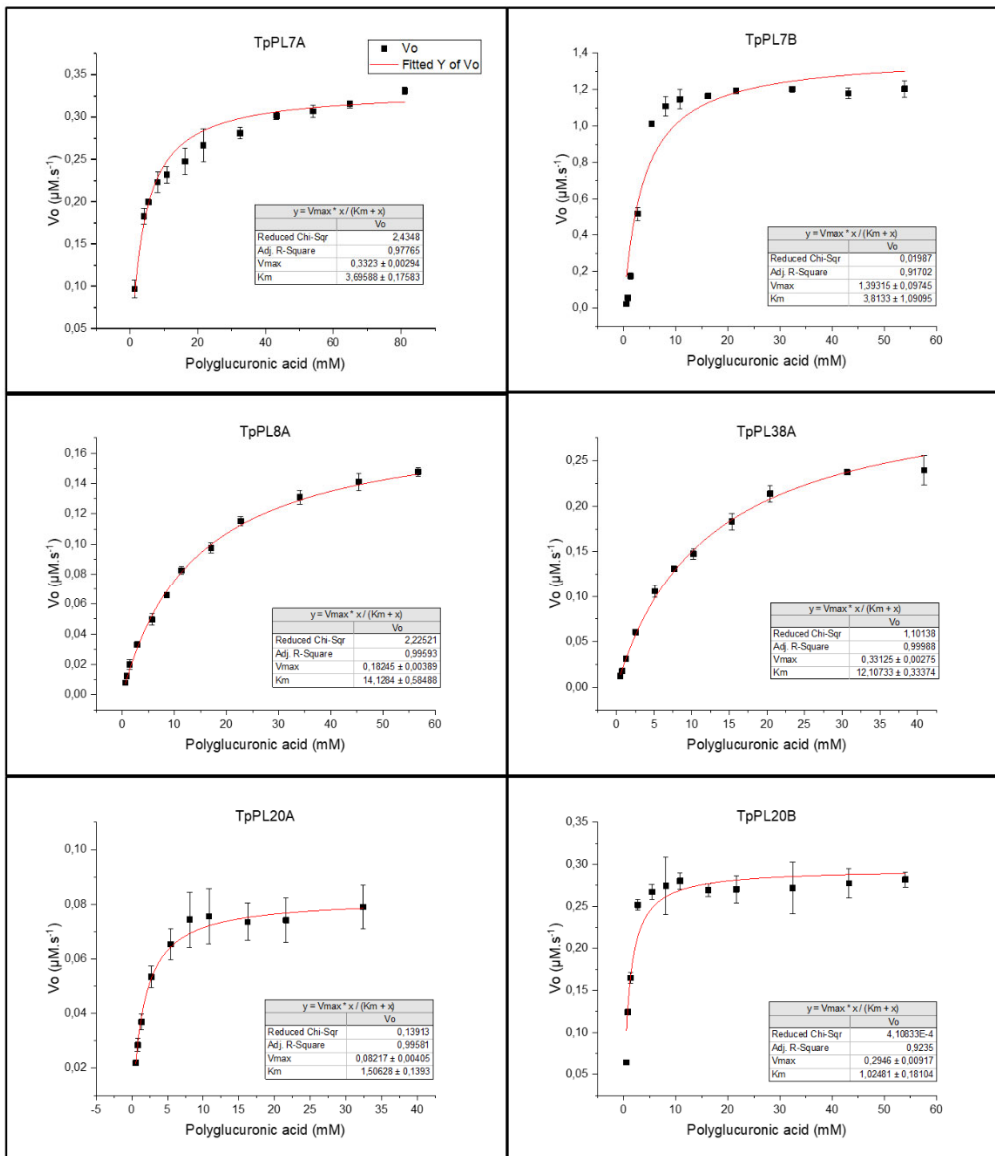

**Supplementary Figure 4.** Initial rates at optimum conditions under increasing substrate concentrations. Red lines are fitted Michaelis-Menten curves. Calculated  $V_{\text{max}}$  and  $K_m$  values are displayed in the grey boxes. Error bars represent standard deviations from triplicate experiments. The graphs and model-fittings were performed in Origin v. 2019b.

|                                                                                     | <sup>1</sup> H | <sup>13</sup> C |       |
|-------------------------------------------------------------------------------------|----------------|-----------------|-------|
| β-glucuronan                                                                        | C-1            | 4.49            | 102.3 |
|                                                                                     | C-2            | 3.35            | 72.9  |
|                                                                                     | C-3            | 3.61            | 74.4  |
|                                                                                     | C-4            | 3.66            | 80.9  |
|                                                                                     | C-5            | 3.85            | 75.3  |
|                                                                                     | C-6            |                 | 175.1 |
| 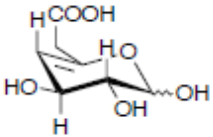   |                | 5.21            | 92.7  |
|                                                                                     |                | 3.69            | 70.2  |
|                                                                                     |                | 4.20            | 65.9  |
|                                                                                     |                | 5.71            | 106.2 |
|                                                                                     |                |                 | 145.5 |
|                                                                                     |                |                 | 169.3 |
|    |                | 4.89            | 93.1  |
|                                                                                     |                | 3.28            | 76.5  |
|                                                                                     |                | 3.91            | 68.1  |
|                                                                                     |                | 2.1/1.87        | 39.2  |
|                                                                                     |                |                 | 95.9  |
|                                                                                     |                |                 | 175.6 |
|  |                | 5.17            | 89.5  |
|                                                                                     |                | 4.00            | 85.0  |
|                                                                                     |                | 4.42            | 72.0  |
|                                                                                     |                | 2.38/2.32       | 44.3  |
|                                                                                     |                |                 | 103.8 |
|                                                                                     |                |                 | 177.1 |
|  |                | 5.08            | 100.1 |
|                                                                                     |                | 3.85            | 69.4  |
|                                                                                     |                | 4.12            | n.d.  |
|                                                                                     |                | 5.86            | 107.2 |
|                                                                                     |                |                 | 144.9 |
|                                                                                     |                |                 | 169.1 |

**Supplementary Figure 5.** NMR, <sup>1</sup>H and <sup>13</sup>C chemical shift assignments for the main isomers of the displayed molecules.

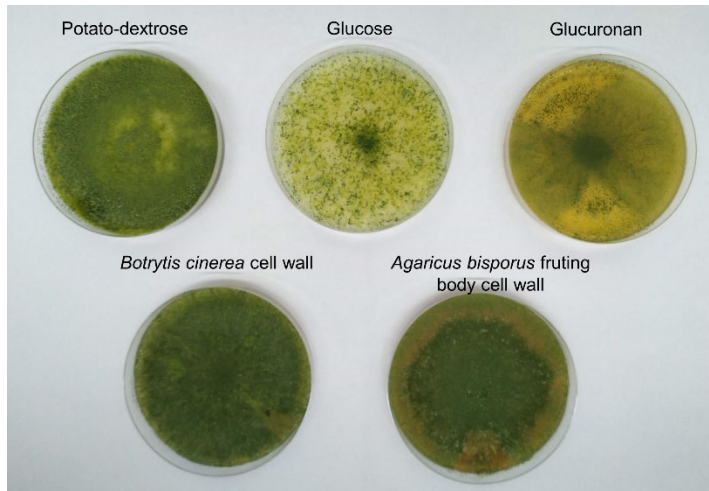

**Supplementary Figure 6.** Agar plates showing growth of *T. parareseei* after six days at 30°C on the various carbon sources used in this study.

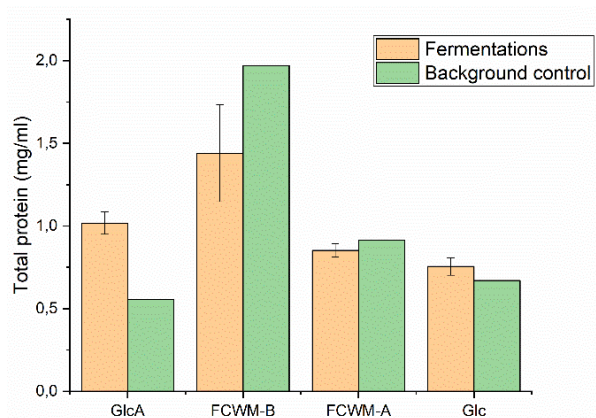

**Supplementary Figure 7.** Total protein content of fermentation supernatant. Estimated by BCA with BSA as standard. Error bars represent standard deviations of triplicate experiments.

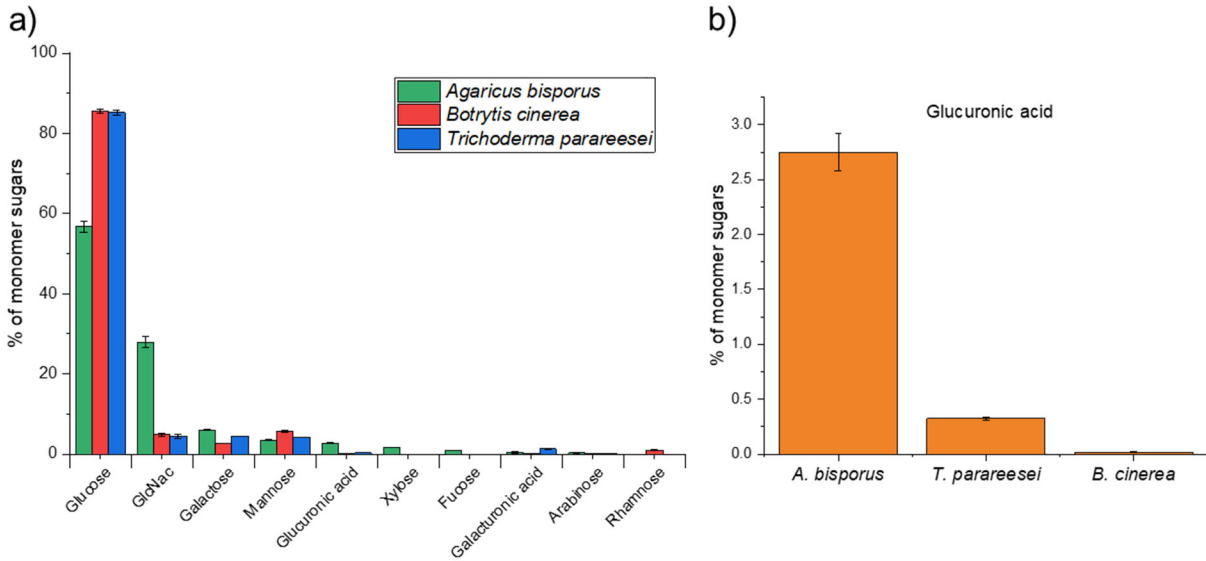

**Supplementary Figure 8.** HPAEC-PAD analysis of sugar monomer composition of fungal cell walls after acid hydrolysis. Values are normalized to total amount of detected sugars. Error bars represent standard deviation of triplicate analysis. **a)** All sugars. **b)** Subset of a) showing only glucuronic acid.

| Phylum     | Class           | Order           | Family               | Organism                             | Major ecology              | Glucuronan |     |      |      |      | GAG  | Pectin |     |     |     |      |      |      |   |   |
|------------|-----------------|-----------------|----------------------|--------------------------------------|----------------------------|------------|-----|------|------|------|------|--------|-----|-----|-----|------|------|------|---|---|
|            |                 |                 |                      |                                      |                            | PL7        | PL8 | PL20 | PL38 | PL14 | PL35 | PL1    | PL3 | PL4 | PL9 | PL11 | PL26 | PL27 |   |   |
| Ascomycota | Sordariomycetes | Hypocreales     | Hypocreaceae         | <i>Trichoderma arundinaceum</i>      | Mycotrophic / generalistic | 2          | 1   | 2    | 2    | 0    | 0    | 0      | 0   | 0   | 0   | 0    | 0    | 0    | 0 | 0 |
| Ascomycota | Sordariomycetes | Hypocreales     | Hypocreaceae         | <i>Trichoderma asperillum</i>        | Mycotrophic / generalistic | 3          | 1   | 2    | 2    | 0    | 0    | 1      | 0   | 0   | 0   | 0    | 0    | 0    | 0 | 0 |
| Ascomycota | Sordariomycetes | Hypocreales     | Hypocreaceae         | <i>Trichoderma atroviride</i>        | Mycotrophic / generalistic | 3          | 1   | 2    | 2    | 0    | 0    | 2      | 0   | 0   | 0   | 0    | 0    | 0    | 0 | 0 |
| Ascomycota | Sordariomycetes | Hypocreales     | Hypocreaceae         | <i>Trichoderma gamsii</i>            | Mycotrophic / generalistic | 3          | 1   | 2    | 2    | 0    | 0    | 2      | 0   | 0   | 0   | 0    | 0    | 0    | 0 | 0 |
| Ascomycota | Sordariomycetes | Hypocreales     | Hypocreaceae         | <i>Trichoderma harzianum</i>         | Mycotrophic / generalistic | 3          | 1   | 2    | 2    | 0    | 0    | 0      | 0   | 0   | 0   | 0    | 0    | 0    | 0 | 0 |
| Ascomycota | Sordariomycetes | Hypocreales     | Hypocreaceae         | <i>Trichoderma longibrachiatum</i>   | Mycotrophic / generalistic | 2          | 1   | 2    | 1    | 0    | 0    | 0      | 0   | 0   | 0   | 0    | 0    | 0    | 0 | 0 |
| Ascomycota | Sordariomycetes | Hypocreales     | Hypocreaceae         | <i>Trichoderma parareesei</i>        | Mycotrophic / generalistic | 2          | 1   | 2    | 1    | 0    | 0    | 0      | 0   | 0   | 0   | 0    | 0    | 0    | 0 | 0 |
| Ascomycota | Sordariomycetes | Hypocreales     | Hypocreaceae         | <i>Trichoderma reesei QMA</i>        | Mycotrophic / generalistic | 2          | 1   | 2    | 1    | 0    | 0    | 0      | 0   | 0   | 0   | 0    | 0    | 0    | 0 | 0 |
| Ascomycota | Sordariomycetes | Hypocreales     | Hypocreaceae         | <i>Trichoderma virens</i>            | Mycotrophic / generalistic | 3          | 1   | 2    | 2    | 0    | 0    | 0      | 0   | 0   | 0   | 0    | 0    | 0    | 0 | 0 |
| Ascomycota | Sordariomycetes | Hypocreales     | Hypocreaceae         | <i>Cladobotryum protusium</i>        | Mycotrophic                | 4          | 1   | 2    | 2    | 0    | 0    | 0      | 0   | 0   | 0   | 0    | 0    | 0    | 0 | 0 |
| Ascomycota | Sordariomycetes | Hypocreales     | Hypocreaceae         | <i>Hypomyces periosus</i>            | Mycotrophic                | 2          | 1   | 1    | 1    | 0    | 0    | 0      | 0   | 0   | 0   | 0    | 0    | 0    | 0 | 1 |
| Ascomycota | Sordariomycetes | Hypocreales     | Hypocreaceae         | <i>Hypomyces rosellus</i>            | Mycotrophic                | 4          | 1   | 2    | 2    | 0    | 0    | 0      | 0   | 0   | 0   | 0    | 0    | 0    | 0 | 0 |
| Ascomycota | Sordariomycetes | Hypocreales     | Hypocreaceae         | <i>Escovopsis weberi</i>             | Mycotrophic                | 1          | 1   | 0    | 2    | 0    | 0    | 2      | 0   | 0   | 0   | 0    | 0    | 0    | 0 | 0 |
| Ascomycota | Sordariomycetes | Hypocreales     | Clavicipitaceae      | <i>Metarhizium acidum</i>            | Entomopathogenic           | 1          | 1   | 1    | 0    | 0    | 0    | 0      | 0   | 0   | 0   | 0    | 0    | 0    | 0 | 0 |
| Ascomycota | Sordariomycetes | Hypocreales     | Clavicipitaceae      | <i>Metarhizium album</i>             | Entomopathogenic           | 1          | 1   | 1    | 0    | 0    | 0    | 0      | 0   | 0   | 0   | 0    | 0    | 0    | 0 | 0 |
| Ascomycota | Sordariomycetes | Hypocreales     | Clavicipitaceae      | <i>Metarhizium brunneum</i>          | Entomopathogenic           | 1          | 1   | 1    | 0    | 0    | 0    | 0      | 0   | 0   | 0   | 0    | 0    | 0    | 0 | 0 |
| Ascomycota | Sordariomycetes | Hypocreales     | Clavicipitaceae      | <i>Metarhizium robertsii</i>         | Entomopathogenic           | 1          | 1   | 1    | 0    | 0    | 0    | 0      | 0   | 0   | 0   | 0    | 0    | 0    | 0 | 0 |
| Ascomycota | Sordariomycetes | Hypocreales     | Clavicipitaceae      | <i>Pachonia chlamydosporia</i>       | Nematophagous              | 5          | 1   | 1    | 2    | 0    | 0    | 0      | 0   | 0   | 0   | 0    | 0    | 0    | 0 | 0 |
| Ascomycota | Sordariomycetes | Hypocreales     | Cordycipitaceae      | <i>Cordyceps fumosorosea</i>         | Entomopathogenic           | 1          | 1   | 1    | 0    | 0    | 1    | 0      | 0   | 0   | 0   | 0    | 0    | 0    | 0 | 0 |
| Ascomycota | Sordariomycetes | Hypocreales     | Cordycipitaceae      | <i>Cordyceps militaris</i>           | Entomopathogenic           | 1          | 1   | 1    | 0    | 0    | 0    | 0      | 0   | 0   | 0   | 0    | 0    | 0    | 0 | 0 |
| Ascomycota | Sordariomycetes | Hypocreales     | Ophiocordycipitaceae | <i>Purpureocillium lilacinum</i>     | Entomopathogenic           | 1          | 1   | 1    | 1    | 0    | 0    | 0      | 0   | 0   | 0   | 0    | 0    | 0    | 0 | 0 |
| Ascomycota | Sordariomycetes | Hypocreales     | Ophiocordycipitaceae | <i>Ophiocordyceps sinensis</i>       | Entomopathogenic           | 2          | 0   | 0    | 0    | 0    | 0    | 0      | 0   | 0   | 0   | 0    | 0    | 0    | 0 | 0 |
| Ascomycota | Sordariomycetes | Hypocreales     | Bionectriaceae       | <i>Clonostachys rosea</i>            | Mycotrophic / generalistic | 0          | 0   | 1    | 0    | 0    | 0    | 18     | 11  | 4   | 1   | 2    | 1    | 3    | 0 | 0 |
| Ascomycota | Sordariomycetes | Hypocreales     | Bionectriaceae       | <i>Geosmithia morbida</i>            | Phytopathogenic            | 0          | 0   | 1    | 0    | 0    | 0    | 2      | 1   | 1   | 0   | 0    | 2    | 0    | 0 | 0 |
| Ascomycota | Sordariomycetes | Hypocreales     | Clavicipitaceae      | <i>Ustilaginoides vires</i>          | Phytopathogenic            | 0          | 0   | 0    | 0    | 0    | 0    | 0      | 0   | 0   | 0   | 0    | 0    | 0    | 0 | 0 |
| Ascomycota | Sordariomycetes | Hypocreales     | Nectriaceae          | <i>Fusarium fujikuroi</i>            | Phytopathogenic            | 0          | 0   | 0    | 0    | 0    | 0    | 11     | 5   | 2   | 2   | 0    | 1    | 0    | 0 | 0 |
| Ascomycota | Sordariomycetes | Hypocreales     | Nectriaceae          | <i>Fusarium graminearum</i>          | Phytopathogenic            | 0          | 0   | 1    | 0    | 0    | 0    | 9      | 7   | 3   | 1   | 0    | 1    | 0    | 0 | 0 |
| Ascomycota | Sordariomycetes | Hypocreales     | Nectriaceae          | <i>Fusarium oxysporum</i>            | Saprobic                   | 0          | 0   | 0    | 0    | 0    | 0    | 10     | 7   | 4   | 2   | 1    | 1    | 0    | 0 | 0 |
| Ascomycota | Sordariomycetes | Diaporthales    | Cryphonectriaceae    | <i>Cryphonectria parasitica</i>      | Phytopathogenic            | 1          | 0   | 0    | 0    | 0    | 0    | 5      | 1   | 2   | 0   | 0    | 0    | 0    | 0 |   |
| Ascomycota | Sordariomycetes | Diaporthales    | Diaporthaceae        | <i>Diaporthe citri</i>               | Phytopathogenic            | 0          | 0   | 0    | 0    | 0    | 0    | 18     | 8   | 7   | 1   | 0    | 1    | 2    | 0 |   |
| Ascomycota | Sordariomycetes | Glomerellales   | Glomerellaceae       | <i>Colletotrichum anigma</i>         | Phytopathogenic            | 0          | 0   | 1    | 0    | 0    | 0    | 16     | 14  | 7   | 3   | 1    | 1    | 2    | 0 |   |
| Ascomycota | Sordariomycetes | Glomerellales   | Glomerellaceae       | <i>Colletotrichum fructicola</i>     | Phytopathogenic            | 0          | 0   | 1    | 0    | 0    | 0    | 18     | 14  | 7   | 3   | 2    | 2    | 2    | 0 |   |
| Ascomycota | Sordariomycetes | Glomerellales   | Glomerellaceae       | <i>Colletotrichum gramincola</i>     | Phytopathogenic            | 0          | 0   | 0    | 0    | 0    | 0    | 7      | 4   | 3   | 1   | 0    | 1    | 1    | 0 |   |
| Ascomycota | Sordariomycetes | Glomerellales   | Glomerellaceae       | <i>Colletotrichum higinianum</i>     | Phytopathogenic            | 0          | 0   | 0    | 0    | 0    | 0    | 18     | 16  | 7   | 4   | 1    | 1    | 1    | 0 |   |
| Ascomycota | Sordariomycetes | Glomerellales   | Glomerellaceae       | <i>Colletotrichum kartsii</i>        | Phytopathogenic            | 0          | 0   | 0    | 0    | 0    | 0    | 18     | 15  | 8   | 3   | 1    | 1    | 2    | 0 |   |
| Ascomycota | Sordariomycetes | Glomerellales   | Glomerellaceae       | <i>Colletotrichum orchidophilum</i>  | Phytopathogenic            | 0          | 0   | 0    | 0    | 0    | 0    | 14     | 9   | 6   | 3   | 0    | 2    | 0    | 0 |   |
| Ascomycota | Sordariomycetes | Glomerellales   | Glomerellaceae       | <i>Colletotrichum scovillei</i>      | Phytopathogenic            | 0          | 0   | 1    | 0    | 0    | 0    | 15     | 13  | 6   | 3   | 1    | 2    | 2    | 0 |   |
| Ascomycota | Sordariomycetes | Glomerellales   | Glomerellaceae       | <i>Colletotrichum siamense</i>       | Phytopathogenic            | 0          | 0   | 1    | 0    | 0    | 0    | 17     | 14  | 7   | 3   | 1    | 2    | 2    | 0 |   |
| Ascomycota | Sordariomycetes | Glomerellales   | Glomerellaceae       | <i>Colletotrichum truncatum</i>      | Phytopathogenic            | 0          | 0   | 0    | 0    | 0    | 1    | 22     | 15  | 9   | 5   | 1    | 2    | 2    | 0 |   |
| Ascomycota | Sordariomycetes | Glomerellales   | Plectosphaerellaceae | <i>Verticillium alfalfae</i>         | Phytopathogenic            | 0          | 0   | 0    | 0    | 0    | 0    | 16     | 11  | 4   | 2   | 1    | 1    | 0    | 0 |   |
| Ascomycota | Sordariomycetes | Glomerellales   | Plectosphaerellaceae | <i>Verticillium dahliae</i>          | Phytopathogenic            | 0          | 0   | 0    | 0    | 0    | 0    | 16     | 11  | 5   | 2   | 1    | 1    | 0    | 0 |   |
| Ascomycota | Sordariomycetes | Magnaporthales  | Magnaporthaceae      | <i>Gaeumannomyces tritici</i>        | Phytopathogenic            | 0          | 0   | 1    | 0    | 0    | 0    | 3      | 1   | 1   | 0   | 0    | 1    | 0    | 0 |   |
| Ascomycota | Sordariomycetes | Magnaporthales  | Pyriculariaceae      | <i>Pyricularia grisea</i>            | Phytopathogenic            | 0          | 0   | 1    | 0    | 0    | 0    | 2      | 1   | 1   | 0   | 0    | 1    | 0    | 0 |   |
| Ascomycota | Sordariomycetes | Magnaporthales  | Pyriculariaceae      | <i>Pyricularia oryzae</i>            | Phytopathogenic            | 0          | 0   | 1    | 0    | 0    | 0    | 2      | 1   | 1   | 0   | 0    | 1    | 0    | 0 |   |
| Ascomycota | Sordariomycetes | Magnaporthales  | Pyriculariaceae      | <i>Pyricularia pennisetigena</i>     | Phytopathogenic            | 0          | 0   | 1    | 0    | 0    | 0    | 2      | 1   | 1   | 0   | 0    | 1    | 0    | 0 |   |
| Ascomycota | Sordariomycetes | Microascales    | Microasceae          | <i>Scedosporium apiospermum</i>      | Saprobic                   | 0          | 0   | 0    | 0    | 0    | 0    | 1      | 0   | 1   | 0   | 0    | 0    | 0    | 0 |   |
| Ascomycota | Sordariomycetes | Ophiostomatales | Ophiostomataceae     | <i>Grosmanina clavigera</i>          | Wood-rot                   | 0          | 0   | 0    | 0    | 0    | 0    | 2      | 1   | 1   | 0   | 0    | 1    | 0    | 0 |   |
| Ascomycota | Sordariomycetes | Ophiostomatales | Ophiostomataceae     | <i>Sporothrix brasiliensis</i>       | Saprobic                   | 0          | 0   | 0    | 1    | 0    | 0    | 0      | 0   | 0   | 0   | 0    | 0    | 0    | 0 |   |
| Ascomycota | Sordariomycetes | Ophiostomatales | Ophiostomataceae     | <i>Sporothrix schenckii</i>          | Saprobic                   | 0          | 0   | 0    | 1    | 0    | 0    | 0      | 0   | 0   | 0   | 0    | 0    | 0    | 0 |   |
| Ascomycota | Sordariomycetes | Sordariales     | Chaetomiaceae        | <i>Chaetomium globosum</i>           | Saprobic                   | 0          | 0   | 1    | 0    | 0    | 0    | 7      | 4   | 2   | 1   | 0    | 1    | 0    | 0 |   |
| Ascomycota | Sordariomycetes | Sordariales     | Chaetomiaceae        | <i>Chaetomium thermophilum</i>       | Saprobic                   | 0          | 0   | 0    | 0    | 0    | 0    | 1      | 3   | 1   | 0   | 0    | 0    | 0    | 0 |   |
| Ascomycota | Sordariomycetes | Sordariales     | Chaetomiaceae        | <i>Podospora anserina</i>            | Saprobic                   | 0          | 0   | 0    | 0    | 0    | 1    | 4      | 2   | 1   | 0   | 0    | 0    | 0    | 0 |   |
| Ascomycota | Sordariomycetes | Sordariales     | Chaetomiaceae        | <i>Thermothelomyces thermophilus</i> | Saprobic                   | 0          | 0   | 1    | 0    | 0    | 0    | 5      | 1   | 1   | 0   | 0    | 1    | 0    | 0 |   |
| Ascomycota | Sordariomycetes | Sordariales     | Chaetomiaceae        | <i>Thermothelomyces terrestris</i>   | Saprobic                   | 1          | 0   | 0    | 0    | 0    | 0    | 0      | 0   | 2   | 0   | 0    | 1    | 0    | 0 |   |
| Ascomycota | Sordariomycetes | Sordariales     | Sordariaceae         | <i>Neurospora crassa</i>             | Saprobic                   | 0          | 0   | 1    | 0    | 0    | 0    | 1      | 1   | 1   | 0   | 0    | 0    | 0    | 0 |   |
| Ascomycota | Sordariomycetes | Sordariales     | Sordariaceae         | <i>Neurospora tetrasperma</i>        | Saprobic                   | 0          | 0   | 1    | 0    | 0    | 0    | 1      | 1   | 1   | 0   | 0    | 0    | 0    | 0 |   |
| Ascomycota | Sordariomycetes | Sordariales     | Sordariaceae         | <i>Sordaria macrospora</i>           | Saprobic                   | 0          | 0   | 1    | 0    | 0    | 0    | 1      | 2   | 1   | 0   | 0    | 0    | 0    | 0 |   |
| Ascomycota | Sordariomycetes | Togniniales     | Togniniaceae         | <i>Phaeoacremonium minimum</i>       | Phytopathogenic            | 0          | 0   | 1    | 0    | 0    | 0    | 4      | 3   | 3   | 1   | 0    | 0    | 0    | 0 |   |
| Ascomycota | Sordariomycetes | Xylariales      | Hypoxylaceae         | <i>Daldinia chlidiae</i>             | Wood-rot                   | 0          | 0   | 2    | 0    | 0    | 0    | 2      | 0   | 5   | 0   | 0    | 1    | 0    | 0 |   |
| Ascomycota | Sordariomycetes | Xylariales      | Pseudomassariaceae   | <i>Pseudomassaria vexata</i>         | Saprobic                   | 0          | 0   | 0    | 0    | 0    | 0    | 10     | 8   | 7   | 1   | 0    | 1    | 0    | 0 |   |
| Ascomycota | Sordariomycetes | Xylariales      | Sporocadaceae        | <i>Pestalotiopsis fici</i>           | Phytopathogenic            | 0          | 0   | 0    | 0    | 0    | 0    | 19     | 7   | 7   | 1   | 1    | 3    | 1    | 0 |   |
| Ascomycota | Sordariomycetes | Xylariales      | Cephalothecaaceae    | <i>Phialemoniopsis curvata</i>       | Saprobic                   | 0          | 0   | 1    | 0    | 0    | 0    | 1      | 1   | 2   | 0   | 0    | 2    | 0    | 0 |   |
| Ascomycota | Eurotiomycetes  | Eurotiales      | Aspergillaceae       | <i>Aspergillus oculatus</i>          | Saprobic                   | 1          | 0   | 0    | 0    | 0    | 0    | 6      | 0   | 3   | 0   | 0    | 1    | 0    | 0 |   |
| Ascomycota | Eurotiomycetes  | Eurotiales      | Aspergillaceae       | <i>Aspergillus flavus</i>            | Saprobic                   | 1          | 0   | 2    | 0    | 0    | 0    | 12     | 3   | 3   | 1   | 0    | 2    | 1    | 0 |   |
| Ascomycota | Eurotiomycetes  | Eurotiales      | Aspergillaceae       | <i>Aspergillus fumigatus</i>         | Saprobic                   | 0          | 0   | 1    | 1    | 0    | 0    | 6      | 3   | 3   | 1   | 0    | 1    | 0    | 0 |   |
| Ascomycota | Eurotiomycetes  | Eurotiales      | Aspergillaceae       | <i>Aspergillus nidulans</i>          | Saprobic                   | 0          | 0   | 2    | 0    | 0    | 0    | 8      | 5   | 4   | 1   | 1    | 1    | 1    | 0 |   |
| Ascomycota | Eurotiomycetes  | Eurotiales      | Aspergillaceae       | <i>Aspergillus niger</i>             | Saprobic                   | 0          | 0   | 0    | 0    | 0    | 0    | 6      | 0   | 2   | 0   | 0    | 0    | 1    | 0 |   |
| Ascomycota | Eurotiomycetes  | Eurotiales      | Aspergillaceae       | <i>Penicillium chrysogenum</i>       | Saprobic                   | 0          | 0   | 1    | 0    | 0    | 0    | 5      | 1   | 2   | 0   | 0    | 1    | 0    | 0 |   |
| Ascomycota | Eurotiomycetes  | Eurotiales      | Aspergillaceae       | <i>Penicillium digitatum</i>         | Phytopathogenic            | 0          | 0   | 0    |      |      |      |        |     |     |     |      |      |      |   |   |



**Supplementary Figure 9.** Genome annotation of PL genes in a broad selection of fungi covering major ecological niches and taxonomic groups. The putative substrate categories, glucuronan, GlycosAmino Glycans (GAG) and pectin are inferred by substrate specificities of experimentally characterized members of the CAZy families and phylogenetic analysis of the protein sequences.

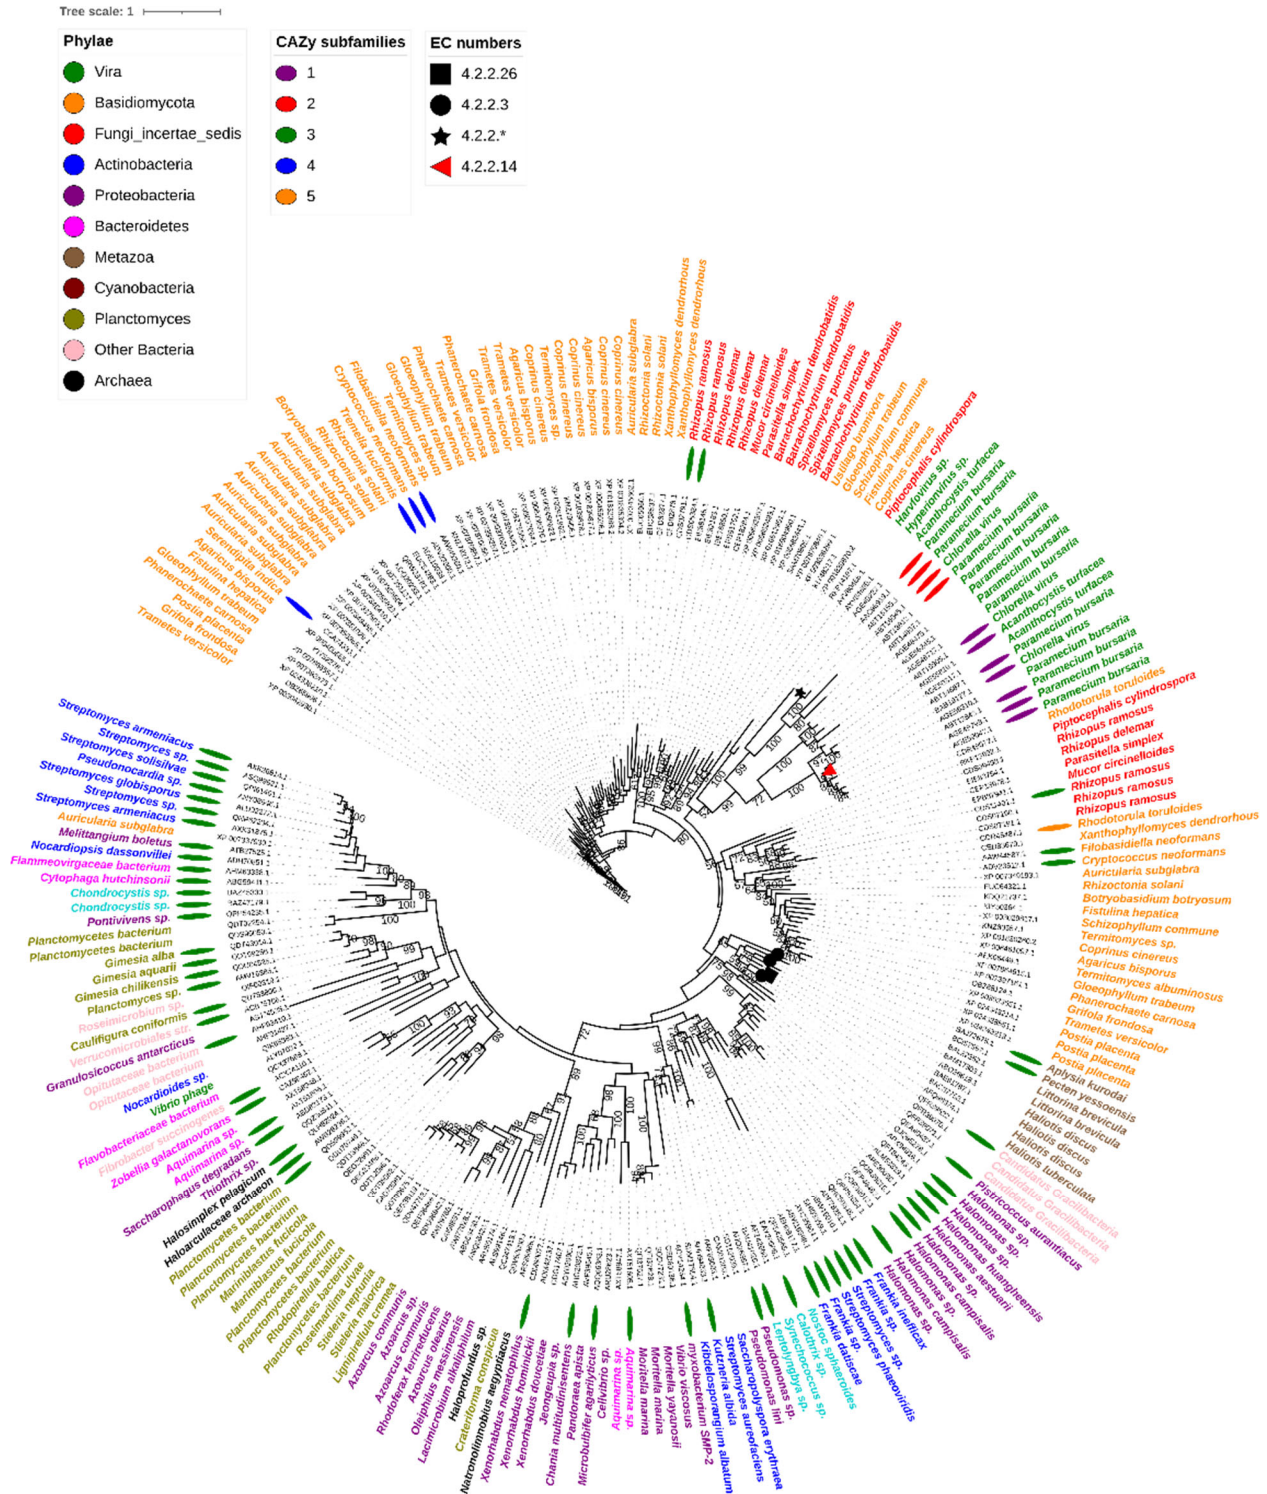

**Supplementary Figure 10.** Maximum likelihood phylogenetic tree of protein sequences from the PL14 family. All sequences were subjected to redundancy, fragmentation and alignment checks. Characterized members are highlighted by symbols at the node ending. Subfamily annotations are highlighted by the colored ellipsis next to the species names. Branch numbers indicate bootstrap values above 50.

**Supplementary Table 1.** Experimental determination of the extinction coefficient (E) for the enzymatic 4-5 double bond formation in glucuronan. Glucuronic acid was used as quantitative standard in the reducing end assay. TpPL7B was used for producing stable double bonds in the substrate under standard assay conditions.

| <b>Glucuronan (mg/mL)</b> | <b>A<sub>235</sub></b> | <b>s.d.</b> | <b>Reduced ends (mM)</b> | <b>s.d.</b> | <b>E</b>          |
|---------------------------|------------------------|-------------|--------------------------|-------------|-------------------|
| 0.8                       | 0.221                  | 0.0025      | 0.0641                   | 0.0419      | 6621              |
| 1.0                       | 0.515                  | 0.0064      | 0.1650                   | 0.0074      | 6013              |
| 1.5                       | 0.322                  | 0.0006      | 0.0957                   | 0.0298      | 6470              |
| <b>Mean</b>               |                        |             |                          |             | <b>6368 ± 317</b> |

**Supplementary Table 2.** Subset of the most abundant CAZymes found in the proteomics analysis. The standard deviations are based on triplicate experiments.

| Accession  | CAZy family | EC number | Enzyme description                                 | Substrate            | Normalized intensities |        |        |        |        |        |         |        |
|------------|-------------|-----------|----------------------------------------------------|----------------------|------------------------|--------|--------|--------|--------|--------|---------|--------|
|            |             |           |                                                    |                      | Glucuronan             | Std. d | FCWM-B | Std. d | FCWM-A | Std. d | Glucose | Std. d |
| OTA07244.1 | GH15        | 3.2.1.3   | glucan 1,4- $\alpha$ -glucosidase                  | Starch               | 0.221                  | 0.011  | 0.326  | 0.139  | 0.058  | 0.031  | 0.097   | 0.020  |
| OTA07404.1 | GH13_1      | 3.2.1.1   | $\alpha$ -amylase                                  | Starch               | 0.000                  | 0.000  | 0.212  | 0.067  | 0.000  | 0.001  | 0.012   | 0.010  |
| OTA02846.1 | GH31        | -         | -                                                  | Starch               | 0.265                  | 0.020  | 0.102  | 0.042  | 0.121  | 0.085  | 0.294   | 0.089  |
| OTA01276.1 | GH79        | -         | -                                                  | Proteoglycan         | 0.342                  | 0.085  | 1.231  | 0.158  | 0.004  | 0.002  | 0.004   | 0.002  |
| OTA07787.1 | GH79        | 3.2.1.31  | $\beta$ -glucuronidase                             | Proteoglycan         | 0.572                  | 0.088  | 0.892  | 0.185  | 0.062  | 0.046  | 0.091   | 0.097  |
| OTA03228.1 | GH89        | 3.2.1.50  | $\alpha$ -N-acetylglucosaminidase                  | Proteoglycan         | 0.032                  | 0.001  | 0.067  | 0.078  | 0.034  | 0.018  | 0.061   | 0.020  |
| OTA08831.1 | GH20        | 3.2.1.52  | $\beta$ -N-acetylhexosaminidase                    | Proteoglycan         | 0.270                  | 0.070  | 0.014  | 0.017  | 0.024  | 0.009  | 0.099   | 0.054  |
| OTA01106.1 | GH20        | 3.2.1.52  | $\beta$ -N-acetylhexosaminidase                    | Proteoglycan         | 0.053                  | 0.004  | 0.000  | 0.000  | 0.081  | 0.028  | 0.071   | 0.016  |
| OTA02666.1 | AA2         | -         | -                                                  | Oxidase              | 0.064                  | 0.022  | 0.220  | 0.044  | 0.101  | 0.016  | 0.144   | 0.062  |
| OTA07476.1 | AA7         | -         | -                                                  | Oxidase              | 1.083                  | 0.183  | 0.209  | 0.069  | 4.863  | 1.046  | 2.833   | 0.093  |
| OTA07907.1 | AA5         | -         | -                                                  | Oxidase              | 0.380                  | 0.041  | 0.073  | 0.036  | 0.923  | 0.174  | 0.382   | 0.068  |
| OTA02290.1 | AA14        | -         | -                                                  | Oxidase              | 0.039                  | 0.006  | 0.059  | 0.016  | 0.131  | 0.026  | 0.049   | 0.012  |
| OTA02426.1 | AA7         | -         | -                                                  | Oxidase              | 0.267                  | 0.014  | 0.049  | 0.017  | 0.231  | 0.098  | 0.080   | 0.066  |
| OTA03014.1 | AA2         | -         | -                                                  | Oxidase              | 0.175                  | 0.011  | 0.025  | 0.026  | 0.260  | 0.059  | 0.107   | 0.056  |
| OTA03614.1 | AA2         | 1.11.1.5  | cytochrome-c peroxidase                            | Oxidase              | 0.098                  | 0.004  | 0.006  | 0.002  | 0.038  | 0.006  | 0.070   | 0.017  |
| OTA03261.1 | GH38        | 3.2.1.24  | $\alpha$ -mannosidase                              | $\alpha$ -1,6-mannan | 0.078                  | 0.018  | 0.000  | 0.000  | 0.077  | 0.016  | 0.119   | 0.044  |
| OTA05230.1 | GH92        | 3.2.1.24  | $\alpha$ -mannosidase                              | $\alpha$ -1,6-mannan | 0.023                  | 0.002  | 0.000  | 0.000  | 0.052  | 0.012  | 0.057   | 0.016  |
| OTA02561.1 | GH71        | 3.2.1.59  | glucan endo-1,3- $\alpha$ -glucosidase             | $\alpha$ -1,3-glucan | 0.004                  | 0.001  | 0.006  | 0.003  | 0.007  | 0.005  | 0.015   | 0.007  |
| OTA00561.1 | GH71        | 3.2.1.59  | glucan endo-1,3- $\alpha$ -glucosidase             | $\alpha$ -1,3-glucan | 0.040                  | 0.012  | 0.000  | 0.000  | 0.016  | 0.006  | 0.036   | 0.012  |
| OSZ9986.1  | CBM24       | 3.2.1.59  | glucan endo-1,3- $\alpha$ -glucosidase             | $\alpha$ -1,3-glucan | 0.038                  | 0.006  | 0.000  | 0.000  | 0.005  | 0.004  | 0.129   | 0.163  |
| OTA05307.1 | GH54        | -         | -                                                  | Xylan                | 0.163                  | 0.019  | 0.467  | 0.109  | 0.272  | 0.214  | 0.399   | 0.125  |
| OTA05875.1 | GH115       | 3.2.1.131 | xylan $\alpha$ -1,2-glucuronosidase                | Xylan                | 0.066                  | 0.013  | 0.000  | 0.000  | 0.023  | 0.002  | 0.067   | 0.031  |
| OTA01922.1 | GH18        | 3.2.1.96  | syl-glycoprotein endo- $\beta$ -N-acetylglucosam   | Glycoprotein         | 0.165                  | 0.016  | 0.251  | 0.126  | 0.062  | 0.042  | 0.188   | 0.068  |
| OTA05399.1 | GH47        | 3.2.1.113 | iannosyl-oligosaccharide 1,2- $\alpha$ -mannosidas | Glycoprotein         | 0.225                  | 0.019  | 0.220  | 0.162  | 0.267  | 0.142  | 0.427   | 0.237  |
| OTA07247.1 | PL20_B      | 4.2.2.14  | glucuronan lyase                                   | Glucuronan           | 0.412                  | 0.016  | 0.863  | 0.453  | 0.003  | 0.002  | 0.007   | 0.003  |
| OTA00986.1 | PL7_4_A     | -         | -                                                  | Glucuronan           | 0.822                  | 0.102  | 0.236  | 0.209  | 0.019  | 0.003  | 0.124   | 0.182  |
| OTA01262.1 | PL7_4_B     | -         | -                                                  | Glucuronan           | 0.049                  | 0.023  | 0.083  | 0.099  | 0.001  | 0.000  | 0.001   | 0.000  |
| OTA06285.1 | PL38        | 4.2.2.14  | glucuronan lyase                                   | Glucuronan           | 0.348                  | 0.151  | 0.067  | 0.048  | 0.010  | 0.007  | 0.009   | 0.003  |
| OTA05836.1 | PL8_4       | -         | -                                                  | Glucuronan           | 0.959                  | 0.181  | 0.049  | 0.026  | 0.018  | 0.000  | 0.024   | 0.014  |
| OSZ99978.1 | -           | 3.2.1.22  | $\alpha$ -galactosidase                            | Galactan             | 0.141                  | 0.038  | 0.000  | 0.000  | 0.014  | 0.003  | 0.024   | 0.012  |
| OTA00159.1 | GH2         | 3.2.1.146 | $\beta$ -galactofuranosidase                       | idophosphogalactoma  | 0.252                  | 0.074  | 0.000  | 0.000  | 0.034  | 0.025  | 0.043   | 0.024  |
| OTA07992.1 | CBM66       | 3.2.1.146 | $\beta$ -galactofuranosidase                       | idophosphogalactoma  | 0.077                  | 0.002  | 0.000  | 0.000  | 0.174  | 0.048  | 0.200   | 0.095  |
| OTA00212.1 | GH75        | 3.2.1.132 | chitinase                                          | Chitosan             | 0.423                  | 0.087  | 1.053  | 0.229  | 0.015  | 0.004  | 0.034   | 0.006  |
| OTA04600.1 | GH18        | 3.2.1.14  | chitinase                                          | Chitin               | 0.325                  | 0.027  | 0.146  | 0.045  | 0.425  | 0.095  | 0.654   | 0.402  |
| OTA00069.1 | GH2         | 3.2.1.165 | exo-1,4- $\beta$ -D-glucosaminidase                | Chitosan             | 0.631                  | 0.114  | 0.043  | 0.027  | 0.142  | 0.094  | 0.045   | 0.021  |
| OTA08247.1 | GH18        | 3.2.1.14  | chitinase                                          | Chitin               | 0.220                  | 0.007  | 0.000  | 0.000  | 0.247  | 0.040  | 0.392   | 0.104  |
| OTA06834.1 | GH18        | 3.2.1.14  | chitinase                                          | Chitin               | 0.107                  | 0.015  | 0.000  | 0.000  | 0.194  | 0.058  | 0.229   | 0.128  |
| OTA01114.1 | CE4         | -         | -                                                  | Chitin               | 0.029                  | 0.005  | 0.000  | 0.000  | 0.102  | 0.032  | 0.033   | 0.020  |
| OTA00434.1 | GH18        | 3.2.1.14  | chitinase                                          | Chitin               | 0.017                  | 0.005  | 0.000  | 0.000  | 0.009  | 0.002  | 0.020   | 0.006  |
| OTA04876.1 | GH5_5       | 3.2.1.4   | cellulase                                          | $\beta$ -1,4-glucan  | 0.006                  | 0.008  | 0.037  | 0.022  | 0.037  | 0.035  | 0.153   | 0.119  |
| OTA02682.1 | GH3         | -         | -                                                  | $\beta$ -1,4-glucan  | 0.003                  | 0.000  | 0.005  | 0.006  | 0.002  | 0.001  | 0.000   | 0.000  |
| OSZ99894.1 | GH3         | -         | -                                                  | $\beta$ -1,4-glucan  | 0.016                  | 0.002  | 0.000  | 0.000  | 0.015  | 0.005  | 0.017   | 0.004  |
| OTA01208.1 | GH30_3      | 3.2.1.75  | glucan endo-1,6- $\beta$ -glucosidase              | $\beta$ -1,6-glucan  | 0.147                  | 0.007  | 1.567  | 0.488  | 0.045  | 0.004  | 0.064   | 0.010  |
| OTA00769.1 | GH55        | 3.2.1.58  | glucan 1,3- $\beta$ -glucosidase                   | $\beta$ -1,3-glucan  | 0.875                  | 0.203  | 0.335  | 0.165  | 0.228  | 0.097  | 0.488   | 0.225  |
| OTA05146.1 | GH55        | 3.2.1.39  | glucan endo-1,3- $\beta$ -D-glucosidase            | $\beta$ -1,3-glucan  | 0.443                  | 0.042  | 0.238  | 0.124  | 0.051  | 0.014  | 0.016   | 0.009  |
| OTA02562.1 | GH64        | 3.2.1.39  | glucan endo-1,3- $\beta$ -D-glucosidase            | $\beta$ -1,3-glucan  | 0.661                  | 0.060  | 0.229  | 0.067  | 0.828  | 0.566  | 0.869   | 0.328  |
| OTA08417.1 | GH128       | -         | -                                                  | $\beta$ -1,3-glucan  | 0.000                  | 0.000  | 0.147  | 0.070  | 0.000  | 0.000  | 0.000   | 0.000  |
| OTA08148.1 | GH55        | -         | -                                                  | $\beta$ -1,3-glucan  | 2.400                  | 0.284  | 0.108  | 0.078  | 0.032  | 0.020  | 0.014   | 0.011  |
| OTA01266.1 | GH55        | 3.2.1.39  | glucan endo-1,3- $\beta$ -D-glucosidase            | $\beta$ -1,3-glucan  | 0.023                  | 0.001  | 0.065  | 0.013  | 0.014  | 0.007  | 0.011   | 0.008  |
| OTA01439.1 | GH128       | -         | -                                                  | $\beta$ -1,3-glucan  | 0.005                  | 0.001  | 0.038  | 0.008  | 0.008  | 0.002  | 0.011   | 0.006  |
| OTA04977.1 | GH55        | 3.2.1.39  | glucan endo-1,3- $\beta$ -D-glucosidase            | $\beta$ -1,3-glucan  | 0.024                  | 0.004  | 0.020  | 0.022  | 0.016  | 0.003  | 0.016   | 0.001  |
| OTA04295.1 | GH81        | 3.2.1.39  | glucan endo-1,3- $\beta$ -D-glucosidase            | $\beta$ -1,3-glucan  | 0.000                  | 0.000  | 0.019  | 0.019  | 0.001  | 0.000  | 0.000   | 0.000  |
| OTA01419.1 | GH132       | 3.2.1.x   | -                                                  | $\beta$ -1,3-glucan  | 0.354                  | 0.045  | 0.000  | 0.000  | 0.337  | 0.022  | 0.388   | 0.091  |
| OTA06148.1 | GH16_3      | 3.2.1.6   | endo-1,3(4)- $\beta$ -glucanase                    | $\beta$ -1,3-glucan  | 0.238                  | 0.031  | 0.000  | 0.000  | 0.536  | 0.065  | 0.265   | 0.071  |
| OTA06837.1 | GH128       | -         | -                                                  | $\beta$ -1,3-glucan  | 0.121                  | 0.071  | 0.000  | 0.000  | 0.121  | 0.024  | 0.130   | 0.093  |
| OTA05871.1 | GH81        | 3.2.1.39  | glucan endo-1,3- $\beta$ -D-glucosidase            | $\beta$ -1,3-glucan  | 0.011                  | 0.002  | 0.000  | 0.000  | 0.006  | 0.002  | 0.010   | 0.003  |
| OTA01208.1 | GH30_3      | 3.2.1.75  | glucan endo-1,6- $\beta$ -glucosidase              | $\beta$ -1,6-glucan  | 0.147                  | 0.007  | 1.567  | 0.488  | 0.045  | 0.004  | 0.064   | 0.010  |
| OTA07339.1 | GH5_15      | 3.2.1.75  | glucan endo-1,6- $\beta$ -glucosidase              | $\beta$ -1,6-glucan  | 0.004                  | 0.000  | 0.000  | 0.000  | 0.015  | 0.005  | 0.017   | 0.004  |

**Supplementary Table 3.** Genomes downloaded from NCBI and used in this study.

| <b>Strain name</b>                    | <b>NCBI assembly accession nb.</b>                         | <b>Strain name</b>                    | <b>NCBI assembly accession nb.</b> |
|---------------------------------------|------------------------------------------------------------|---------------------------------------|------------------------------------|
| <i>Achlya hypogyna</i>                | GCA_002081595.1                                            | <i>Pyricularia oryzae</i>             | GCF_000002495.2                    |
| <i>Agaricus bisporus</i>              | GCA_000300575.1_Agabi_varbisH97_2                          | <i>Grosmannia clavigera</i>           | GCF_000143105.1                    |
| <i>Aspergillus aculeatus</i>          | GCF_001890905.1_Aspac1                                     | <i>Chaetomium globosum</i>            | GCF_000143365.1                    |
| <i>Aspergillus flavus</i>             | GCA_000006275.3                                            | <i>Gaeumannomyces tritici</i>         | GCF_000145635.1                    |
| <i>Aspergillus fumigatus</i>          | GCF_000002655.1_ASM265v1                                   | <i>Colletotrichum graminicola</i>     | GCF_000149035.1                    |
| <i>Aspergillus nidulans</i>           | GCF_000149205.2_ASM14920v2                                 | <i>Verticillium dahliae</i>           | GCF_000150675.1                    |
| <i>Aspergillus niger</i>              | GCF_000002855.3_ASM285v2                                   | <i>Verticillium alfalfae</i>          | GCF_000150825.1                    |
| <i>Auricularia subglabra</i>          | GCF_000265015.1_Auricularia_subglabra_SS-5_V1.0            | <i>Sordaria macrospora</i>            | GCF_000182805.2                    |
| <i>Batrachochytrium dendrobatidis</i> | GCF_000203795.1_v1.0                                       | <i>Neurospora crassa</i>              | GCF_000182925.2                    |
| <i>Botryobasidium botryosum</i>       | GCA_000697705.1_Botbo1                                     | <i>Metarhizium acridum</i>            | GCF_000187405.1                    |
| <i>Botrytis cinerea</i>               | GCF_000143535.2_ASM14353v4                                 | <i>Metarhizium robertsii</i>          | GCF_000187425.2                    |
| <i>Catenaria anguillulae</i>          | GCA_002102555.1_Catan2                                     | <i>Neurospora tetrasperma</i>         | GCF_000213175.1                    |
| <i>Cladobotryum protrusum</i>         | GCA_004303015.1_ASM430301v1                                | <i>Chaetomium thermophilum</i>        | GCF_000221225.1                    |
| <i>Clonostachys rosea</i>             | GCA_000963775.2_ASM96377v2                                 | <i>Cordyceps militaris</i>            | GCF_000225605.1                    |
| <i>Coprinopsis cinerea</i>            | GCF_000182895.1_CC3                                        | <i>Thermothelomyces thermophilus</i>  | GCF_000226095.1                    |
| <i>Cordyceps fumosorosea</i>          | GCF_001636725.1_SF_1.0                                     | <i>Thermothielavioides terrestris</i> | GCF_000226115.1                    |
| <i>Cordyceps militaris</i>            | GCF_000225605.1                                            | <i>Podospira anserina</i>             | GCF_000226545.1                    |
| <i>Cryptococcus gattii</i>            | GCF_000185945.1_ASM18594v1                                 | <i>Beauveria bassiana</i>             | GCF_000228075.1                    |
| <i>Escovopsis weberi</i>              | GCA_001278495.1_ASM127849v1                                | <i>Phaeoacremonium minimum</i>        | GCF_000392275.1                    |
| <i>Fistulina hepatica</i>             | GCA_000934395.1_Fishe1                                     | <i>Pestalotiopsis fici</i>            | GCF_000516985.1                    |
| <i>Fusarium fujikuroi</i>             | GCF_900079805.1_Fusarium_fujikuroi_IM58289_V2              | <i>Ustilagoidea vires</i>             | GCF_000687475.1                    |
| <i>Fusarium graminearum</i>           | GCF_000240135.3_ASM24013v3                                 | <i>Scedosporium apiospermum</i>       | GCF_000732125.1                    |
| <i>Fusarium oxysporum</i>             | GCF_000149955.1_ASM14995v2                                 | <i>Metarhizium album</i>              | GCF_000804445.1                    |
| <i>Gloeophyllum trabeum</i>           | GCF_000344685.1_Glotr1_1                                   | <i>Metarhizium brunneum</i>           | GCF_000814965.1                    |
| <i>Gonapodya prolifera</i>            | GCA_001574975.1_Ganpr1                                     | <i>Sporothrix brasiliensis</i>        | GCF_000820605.1                    |
| <i>Grifola frondosa</i>               | GCA_001683735.1_ASM168373v1                                | <i>Sporothrix schenckii</i>           | GCF_000961545.1                    |
| <i>Hypomyces perniciosus</i>          | GCA_0008477525.1_ASM847752v1                               | <i>Drechmeria coniospora</i>          | GCF_001625195.1                    |
| <i>Hypomyces rosellus</i>             | GCA_011799845.1_ASM1179984v1                               | <i>Cordyceps fumosorosea</i>          | GCF_001636725.1                    |
| <i>Lentinus edodes</i>                | GCA_002003045.1                                            | <i>Pochonia chlamydosporia</i>        | GCF_001653235.2                    |
| <i>Lichtheimia ramosa</i>             | GCA_000945115.1_Lramosa_hybrid_454_Illumina                | <i>Purpureocillium lilacinum</i>      | GCF_001653265.1                    |
| <i>Lichtheimia ramosa</i>             | GCA_000945115.1                                            | <i>Colletotrichum higginsianum</i>    | GCF_001672515.1                    |
| <i>Moesziomyces antarcticus</i>       | GCF_000747765.1_ASM74776v1                                 | <i>Colletotrichum orchidophilum</i>   | GCF_001831195.1                    |
| <i>Mucor circinelloides</i>           | GCA_000401635.1_Muco_sp_1006Ph_V1                          | <i>Pseudomassariella vexata</i>       | GCF_002105095.1                    |
| <i>Ophiocordyceps sinensis</i>        | GCA_012934285.1_ASM1293428v1                               | <i>Sodiomyces alkalinus</i>           | GCF_003711515.1                    |
| <i>Paradendryphiella salina</i>       | GCA_900634815.1                                            | <i>Verticillium nonalfalfae</i>       | GCF_003724135.2                    |
| <i>Parasitella parasitica</i>         | GCA_000938895.1_PPv1                                       | <i>Pyricularia pennisetigena</i>      | GCF_004337985.1                    |
| <i>Penicillium chrysogenum</i>        | GCA_000710275.1_ASM71027v1                                 | <i>Phialemoniopsis curvata</i>        | GCF_004353045.1                    |
| <i>Penicillium digitatum</i>          | GCF_000315645.1_PdigPd1_v1                                 | <i>Pyricularia grisea</i>             | GCF_004355905.1                    |
| <i>Penicillium expansum</i>           | GCF_000769745.1_ASM76974v1                                 | <i>Daldinia childiae</i>              | GCF_008694065.1                    |
| <i>Penicillium roqueforti</i>         | GCA_000513255.1_FROQFM164_20130607                         | <i>Colletotrichum fructicola</i>      | GCF_009771025.1                    |
| <i>Phanerochaete carnososa</i>        | GCF_000300595.1_Phanerochaete_carnososa_HH1B-10118-Sp_v1.0 | <i>Colletotrichum scovillei</i>       | GCF_011075155.1                    |
| <i>Piptocephalis cylindrospora</i>    | GCA_000361445.1_Ppicy3_1                                   | <i>Cryphonectria parasitica</i>       | GCF_011745365.1                    |
| <i>Pochonia chlamydosporia</i>        | GCF_001653235.2_ASM165323v2                                | <i>Colletotrichum karsti</i>          | GCF_011947395.1                    |
| <i>Podospira anserina</i>             | GCF_000226545.1                                            | <i>Geosmithia morbida</i>             | GCF_012550715.1                    |
| <i>Postia placenta</i>                | GCF_002117355.1_PospIRSB12_1                               | <i>Colletotrichum aenigma</i>         | GCF_013390185.1                    |
| <i>Pseudozyma flocculosa</i>          | GCF_000417875.1_Pfloc1_1.0                                 | <i>Colletotrichum siamense</i>        | GCF_013390195.1                    |
| <i>Puccinia striiformis</i>           | GCA_001191645.1                                            | <i>Colletotrichum truncatum</i>       | GCF_014235925.1                    |
| <i>Puccinia triticina</i>             | GCA_000151525.2_P_triticina_1_1_V2                         | <i>Diaporthe citri</i>                | GCF_014595645.1                    |
| <i>Rhizoctonia solani</i>             | GCA_000524645.1_Rhizoctonia_solani_AG-3                    | <i>Pseudogymnoascus verrucosus</i>    | GCA_001662655.1                    |
| <i>Rhizophlyctis rosea</i>            | GCA_002214945.1                                            |                                       |                                    |
| <i>Rhizopus delemar</i>               | GCA_000149305.1_RO3                                        |                                       |                                    |
| <i>Schizophyllum commune</i>          | GCF_000143185.1_v1.0                                       |                                       |                                    |
| <i>Sclerotinia sclerotiorum</i>       | GCF_000146945.2_ASM14694v2                                 |                                       |                                    |
| <i>Spizellomyces punctatus</i>        | GCF_000182565.1_S_punctatus_V1                             |                                       |                                    |
| <i>Syncephalis pseudoplumigaleata</i> | GCA_003614755.1_Synps1                                     |                                       |                                    |
| <i>Talaromyces marneffei</i>          | GCF_000001985.1                                            |                                       |                                    |
| <i>Talaromyces verruculosus</i>       | GCA_001305275.1                                            |                                       |                                    |
| <i>Termitomyces</i>                   | GCA_001263195.1_TerJ1321.0                                 |                                       |                                    |
| <i>Trametes versicolor</i>            | GCF_000271585.1_Trametes_versicolor_v1.0                   |                                       |                                    |
| <i>Trichoderma asperellum</i>         | GCF_003025105.1_Trias_v_1.0                                |                                       |                                    |
| <i>Trichoderma atroviride</i>         | GCF_000171015.1_TRIAT_v2.0                                 |                                       |                                    |
| <i>Trichoderma gamsii</i>             | GCF_001481775.2_TGAM01v2                                   |                                       |                                    |
| <i>Trichoderma harzianum</i>          | GCF_003025095.1_Triha_v1.0                                 |                                       |                                    |
| <i>Trichoderma longibrachiatum</i>    | GCA_003025155.1_TriLo3                                     |                                       |                                    |
| <i>Trichoderma parareesei</i>         | GCA_001050175.1_Tpara_v1.0                                 |                                       |                                    |
| <i>Trichoderma reesei QMA</i>         | GCF_000167675.1_v2.0                                       |                                       |                                    |
| <i>Trichoderma virens</i>             | GCF_000170995.1_TRV1_v2.0                                  |                                       |                                    |
| <i>Ustilago maydis</i>                | GCF_000328475.2_Umaydis521_2.0                             |                                       |                                    |
| <i>Verticillium alfalfae</i>          | GCF_000150825.1_ASM15082v1                                 |                                       |                                    |
| <i>Verticillium dahliae</i>           | GCF_000150675.1_ASM15067v2                                 |                                       |                                    |
